# Supplementary material for: Analysis of Acupoint Selection and Combinations in Acupuncture Treatment of Asthma Based on Data Mining
Source: Research Square preprint supplement (doi:10.21203/rs.3.rs-139697/v1), 2021-01-07
Supplement: Supplementary file 1 [file 86c880f9669f204221dcf215.docx]

**Supplementary Figure legends**

Fig. S1 Association rule mining of specific acupoints for asthma. (a) A scatter plot for the 88 association rules mined in the retrieved CCTs. The minimum support required was set to 15%, minimum confidence required to 30%, and maximum number of LHS to 2. The lift values of these association rules are illustrated on a color scale. (b) Graph-based visualization of the top 10 association rules sorted by lift values. Rules are shown as circles with color. Color shading is used to indicate the lift value of a rule. COP: Connecting point; FTP: Five Transport Point; CPOTEV: Confluence Point of The Eight Vessels; TP: Transport Point; CRP: Crossing Point; EMP: Eight Meeting Point; AP: Alarm Point; LSPOTSB: Lower Sea Point of The Six Bowels.

Fig. S2 Association rule mining of meridians for asthma. (a) A scatter plot for the 18 association rules mined in the retrieved CCTs. The minimum support required was set to 15%, minimum confidence required to 30%, and maximum number of LHS to 2. The lift values of these association rules are illustrated on a color scale. (b) Graph-based visualization of the top 10 association rules sorted by lift values. Rules are shown as circles with color. Color shading is used to indicate the lift value of a rule.
