# Supplementary material for: Analysis of Acupoint Selection and Combinations in Acupuncture Treatment of Asthma Based on Data Mining
Source: Research Square preprint supplement (doi:10.21203/rs.3.rs-139697/v1), 2021-01-07
Supplement: Supplementary file 2 [file dde8ac3ebf3051c37e702433.docx]

Supplementary Table 1. The list of the 60 acupoint association rules mined from retrieved CCTs

| **No.** | **Association rules** | **Support** | **Confidence** | **Coverage** | **Lift** |
| --- | --- | --- | --- | --- | --- |
| 1 | {BL20,EX-B1} => {BL23} | 0.18579 | 0.97143 | 0.19126 | 2.69351 |
| 2 | {BL20} => {BL23} | 0.27869 | 0.91071 | 0.30601 | 2.52516 |
| 3 | {BL23} => {BL20} | 0.27869 | 0.77273 | 0.36066 | 2.52516 |
| 4 | {BL13,BL20} => {BL23} | 0.27869 | 0.91071 | 0.30601 | 2.52516 |
| 5 | {BL13,BL23} => {BL20} | 0.27869 | 0.77273 | 0.36066 | 2.52516 |
| 6 | {BL23,EX-B1} => {BL20} | 0.18579 | 0.73913 | 0.25137 | 2.41537 |
| 7 | {BL13,BL43} => {EX-B1} | 0.15301 | 0.90323 | 0.16940 | 1.55934 |
| 8 | {BL13,GV14} => {BL12} | 0.17486 | 0.46377 | 0.37705 | 1.54308 |
| 9 | {BL43} => {EX-B1} | 0.16940 | 0.88571 | 0.19126 | 1.52911 |
| 10 | {BL12,BL13} => {GV14} | 0.17486 | 0.61538 | 0.28415 | 1.50154 |
| 11 | {BL12} => {GV14} | 0.18033 | 0.60000 | 0.30055 | 1.46400 |
| 12 | {GV14} => {BL12} | 0.18033 | 0.44000 | 0.40984 | 1.46400 |
| 13 | {BL13,EX-B1} => {BL23} | 0.25137 | 0.46465 | 0.54098 | 1.28834 |
| 14 | {BL13,ST36} => {EX-B1} | 0.18579 | 0.72340 | 0.25683 | 1.24890 |
| 15 | {BL13,EX-B1} => {CV17} | 0.16940 | 0.31313 | 0.54098 | 1.24572 |
| 16 | {BL13,CV17} => {EX-B1} | 0.16940 | 0.70455 | 0.24044 | 1.21634 |
| 17 | {BL23} => {EX-B1} | 0.25137 | 0.69697 | 0.36066 | 1.20326 |
| 18 | {EX-B1} => {BL23} | 0.25137 | 0.43396 | 0.57923 | 1.20326 |
| 19 | {BL13,BL23} => {EX-B1} | 0.25137 | 0.69697 | 0.36066 | 1.20326 |
| 20 | {BL13,EX-B1} => {ST36} | 0.18579 | 0.34343 | 0.54098 | 1.18582 |
| 21 | {ST36} => {EX-B1} | 0.19672 | 0.67925 | 0.28962 | 1.17266 |
| 22 | {EX-B1} => {ST36} | 0.19672 | 0.33962 | 0.57923 | 1.17266 |
| 23 | {CV17} => {EX-B1} | 0.16940 | 0.67391 | 0.25137 | 1.16345 |
| 24 | {BL13,EX-B1} => {BL20} | 0.19126 | 0.35354 | 0.54098 | 1.15530 |
| 25 | {BL20,BL23} => {EX-B1} | 0.18579 | 0.66667 | 0.27869 | 1.15094 |
| 26 | {BL20} => {BL13} | 0.30601 | 1.00000 | 0.30601 | 1.12963 |
| 27 | {BL13} => {BL20} | 0.30601 | 0.34568 | 0.88525 | 1.12963 |
| 28 | {BL23} => {BL13} | 0.36066 | 1.00000 | 0.36066 | 1.12963 |
| 29 | {BL13} => {BL23} | 0.36066 | 0.40741 | 0.88525 | 1.12963 |
| 30 | {CV17,EX-B1} => {BL13} | 0.16940 | 1.00000 | 0.16940 | 1.12963 |
| 31 | {BL20,BL23} => {BL13} | 0.27869 | 1.00000 | 0.27869 | 1.12963 |
| 32 | {BL20,EX-B1} => {BL13} | 0.19126 | 1.00000 | 0.19126 | 1.12963 |
| 33 | {BL23,EX-B1} => {BL13} | 0.25137 | 1.00000 | 0.25137 | 1.12963 |
| 34 | {BL12,GV14} => {BL13} | 0.17486 | 0.96970 | 0.18033 | 1.09540 |
| 35 | {BL12,EX-B1} => {BL13} | 0.16393 | 0.96774 | 0.16940 | 1.09319 |
| 36 | {CV17} => {BL13} | 0.24044 | 0.95652 | 0.25137 | 1.08052 |
| 37 | {BL20} => {EX-B1} | 0.19126 | 0.62500 | 0.30601 | 1.07901 |
| 38 | {EX-B1} => {BL20} | 0.19126 | 0.33019 | 0.57923 | 1.07901 |
| 39 | {BL13,BL20} => {EX-B1} | 0.19126 | 0.62500 | 0.30601 | 1.07901 |
| 40 | {BL12} => {BL13} | 0.28415 | 0.94545 | 0.30055 | 1.06801 |
| 41 | {BL13} => {BL12} | 0.28415 | 0.32099 | 0.88525 | 1.06801 |
| 42 | {EX-B1,ST36} => {BL13} | 0.18579 | 0.94444 | 0.19672 | 1.06687 |
| 43 | {CV22} => {BL13} | 0.16940 | 0.93939 | 0.18033 | 1.06117 |
| 44 | {EX-B1} => {BL13} | 0.54098 | 0.93396 | 0.57923 | 1.05503 |
| 45 | {BL13} => {EX-B1} | 0.54098 | 0.61111 | 0.88525 | 1.05503 |
| 46 | {GV14} => {BL13} | 0.37705 | 0.92000 | 0.40984 | 1.03926 |
| 47 | {BL13} => {GV14} | 0.37705 | 0.42593 | 0.88525 | 1.03926 |
| 48 | {ST40} => {BL13} | 0.16393 | 0.90909 | 0.18033 | 1.02694 |
| 49 | {EX-B1,GV14} => {BL13} | 0.21311 | 0.90698 | 0.23497 | 1.02455 |
| 50 | {LU7} => {BL13} | 0.15847 | 0.90625 | 0.17486 | 1.02373 |
| 51 | {BL43,EX-B1} => {BL13} | 0.15301 | 0.90323 | 0.16940 | 1.02031 |
| 52 | {BL13,EX-B1} => {BL12} | 0.16393 | 0.30303 | 0.54098 | 1.00826 |
| 53 | {ST36} => {BL13} | 0.25683 | 0.88679 | 0.28962 | 1.00175 |
| 54 | {BL43} => {BL13} | 0.16940 | 0.88571 | 0.19126 | 1.00053 |
| 55 | {BL12,BL13} => {EX-B1} | 0.16393 | 0.57692 | 0.28415 | 0.99601 |
| 56 | {GV14} => {EX-B1} | 0.23497 | 0.57333 | 0.40984 | 0.98981 |
| 57 | {EX-B1} => {GV14} | 0.23497 | 0.40566 | 0.57923 | 0.98981 |
| 58 | {BL13,GV14} => {EX-B1} | 0.21311 | 0.56522 | 0.37705 | 0.97580 |
| 59 | {BL12} => {EX-B1} | 0.16940 | 0.56364 | 0.30055 | 0.97307 |
| 60 | {BL13,EX-B1} => {GV14} | 0.21311 | 0.39394 | 0.54098 | 0.96121 |

Supplementary Table 2. The list of the 88 specific acupoint association rules mined from retrieved CCTs

| **NO.** | **Association rules** | **Support** | **Confidence** | **Coverage** | **Lift** |
| --- | --- | --- | --- | --- | --- |
| 1 | {COP,FTP} => {CPOTEV} | 0.17778 | 0.65306 | 0.27222 | 3.35860 |
| 2 | {CPOTEV,FTP} => {COP} | 0.17778 | 0.96970 | 0.18333 | 3.11688 |
| 3 | {CPOTEV,TP} => {COP} | 0.16668 | 0.96774 | 0.17222 | 3.11060 |
| 4 | {COP,TP} => {CPOTEV} | 0.16668 | 0.60000 | 0.27778 | 3.08571 |
| 5 | {CPOTEV} => {COP} | 0.18333 | 0.94286 | 0.19444 | 3.03061 |
| 6 | {COP} => {CPOTEV} | 0.18333 | 0.58929 | 0.31111 | 3.03061 |
| 7 | {CRP,EMP} => {AP} | 0.26668 | 0.80000 | 0.33333 | 2.36066 |
| 8 | {AP,CRP} => {EMP} | 0.26668 | 0.92308 | 0.28889 | 2.30769 |
| 9 | {AP,TP} => {EMP} | 0.29444 | 0.91379 | 0.32222 | 2.28448 |
| 10 | {EMP,TP} => {AP} | 0.29444 | 0.76812 | 0.38333 | 2.26657 |
| 11 | {AP} => {EMP} | 0.30556 | 0.90164 | 0.33889 | 2.25410 |
| 12 | {EMP} => {AP} | 0.30556 | 0.76389 | 0.40000 | 2.25410 |
| 13 | {CPOTEV,TP} => {FTP} | 0.17222 | 1.00000 | 0.17222 | 2.09302 |
| 14 | {FTP,TP} => {CPOTEV} | 0.17222 | 0.40260 | 0.42778 | 2.07050 |
| 15 | {LSPOTSB,TP} => {FTP} | 0.26667 | 0.97959 | 0.27222 | 2.05031 |
| 16 | {CRP,FTP} => {LSPOTSB} | 0.21111 | 0.63333 | 0.33333 | 2.03571 |
| 17 | {COP,CPOTEV} => {FTP} | 0.17778 | 0.96970 | 0.18333 | 2.02960 |
| 18 | {LSPOTSB} => {FTP} | 0.30000 | 0.96429 | 0.31111 | 2.01827 |
| 19 | {FTP} => {LSPOTSB} | 0.30000 | 0.62791 | 0.47778 | 2.01827 |
| 20 | {FTP,TP} => {LSPOTSB} | 0.26667 | 0.62338 | 0.42778 | 2.00371 |
| 21 | {CRP,LSPOTSB} => {FTP} | 0.21111 | 0.95000 | 0.22222 | 1.98837 |
| 22 | {CPOTEV} => {FTP} | 0.18333 | 0.94286 | 0.19444 | 1.97342 |
| 23 | {FTP} => {CPOTEV} | 0.18333 | 0.38372 | 0.47778 | 1.97342 |
| 24 | {COP,CRP} => {FTP} | 0.20000 | 0.92308 | 0.21667 | 1.93202 |
| 25 | {CRP,FTP} => {COP} | 0.20000 | 0.60000 | 0.33333 | 1.92857 |
| 26 | {COP,TP} => {FTP} | 0.25556 | 0.92000 | 0.27778 | 1.92558 |
| 27 | {FTP,TP} => {COP} | 0.25556 | 0.59740 | 0.42778 | 1.92022 |
| 28 | {COP} => {FTP} | 0.27222 | 0.87500 | 0.31111 | 1.83140 |
| 29 | {FTP} => {COP} | 0.27222 | 0.56977 | 0.47778 | 1.83140 |
| 30 | {LSPOTSB} => {COP} | 0.15000 | 0.48214 | 0.31111 | 1.54975 |
| 31 | {COP} => {LSPOTSB} | 0.15000 | 0.48214 | 0.31111 | 1.54975 |
| 32 | {AP,EMP} => {CRP} | 0.26667 | 0.87273 | 0.30556 | 1.24675 |
| 33 | {CRP,TP} => {AP} | 0.27222 | 0.41525 | 0.65556 | 1.22534 |
| 34 | {EMP,FTP} => {CRP} | 0.16111 | 0.85294 | 0.18889 | 1.21849 |
| 35 | {AP} => {CRP} | 0.28889 | 0.85246 | 0.33889 | 1.21780 |
| 36 | {CRP} => {AP} | 0.28889 | 0.41270 | 0.70000 | 1.21780 |
| 37 | {CRP,FTP} => {EMP} | 0.16111 | 0.48333 | 0.33333 | 1.20833 |
| 38 | {CRP,TP} => {EMP} | 0.31667 | 0.48305 | 0.65556 | 1.20763 |
| 39 | {AP,TP} => {CRP} | 0.27222 | 0.84483 | 0.32222 | 1.20690 |
| 40 | {EMP} => {CRP} | 0.33333 | 0.83333 | 0.40000 | 1.19048 |
| 41 | {CRP} => {EMP} | 0.33333 | 0.47619 | 0.70000 | 1.19048 |
| 42 | {EMP,TP} => {CRP} | 0.31667 | 0.82609 | 0.38333 | 1.18012 |
| 43 | {COP,FTP} => {CRP} | 0.20000 | 0.73469 | 0.27222 | 1.04956 |
| 44 | {AP,FTP} => {TP} | 0.15000 | 0.96429 | 0.15556 | 1.04561 |
| 45 | {AP,EMP} => {TP} | 0.29444 | 0.96364 | 0.30556 | 1.04491 |
| 46 | {EMP} => {TP} | 0.38333 | 0.95833 | 0.40000 | 1.03916 |
| 47 | {TP} => {EMP} | 0.38333 | 0.41566 | 0.92222 | 1.03916 |
| 48 | {FTP,TP} => {EMP} | 0.17778 | 0.41558 | 0.42778 | 1.03896 |
| 49 | {FTP,TP} => {AP} | 0.15000 | 0.35065 | 0.42778 | 1.03470 |
| 50 | {AP} => {TP} | 0.32222 | 0.95082 | 0.33889 | 1.03101 |
| 51 | {TP} => {AP} | 0.32222 | 0.34940 | 0.92222 | 1.03101 |
| 52 | {CRP,EMP} => {TP} | 0.31667 | 0.95000 | 0.33333 | 1.03012 |
| 53 | {COP,TP} => {CRP} | 0.20000 | 0.72000 | 0.27778 | 1.02857 |
| 54 | {AP,CRP} => {TP} | 0.27222 | 0.94231 | 0.28889 | 1.02178 |
| 55 | {EMP,FTP} => {TP} | 0.17778 | 0.94118 | 0.18889 | 1.02055 |
| 56 | {LSPOTSB} => {CRP} | 0.22222 | 0.71427 | 0.31111 | 1.02041 |
| 57 | {CRP} => {LSPOTSB} | 0.22222 | 0.31746 | 0.70000 | 1.02041 |
| 58 | {CPOTEV,FTP} => {TP} | 0.17222 | 0.93939 | 0.18333 | 1.01862 |
| 59 | {COP,FTP} => {TP} | 0.25556 | 0.93878 | 0.27222 | 1.01795 |
| 60 | {CRP} => {TP} | 0.65556 | 0.93651 | 0.70000 | 1.01549 |
| 61 | {TP} => {CRP} | 0.65556 | 0.71084 | 0.92222 | 1.01549 |
| 62 | {CRP,EMP} => {FTP} | 0.16111 | 0.48333 | 0.33333 | 1.01163 |
| 63 | {FTP,LSPOTSB} => {CRP} | 0.21111 | 0.70370 | 0.30000 | 1.00529 |
| 64 | {FTP,TP} => {CRP} | 0.30000 | 0.70122 | 0.42778 | 1.00186 |
| 65 | {COP,CRP} => {TP} | 0.20000 | 0.92308 | 0.21667 | 1.00093 |
| 66 | {FTP} => {CRP} | 0.33333 | 0.69767 | 0.47778 | 0.99668 |
| 67 | {CRP} => {FTP} | 0.33333 | 0.47619 | 0.70000 | 0.99668 |
| 68 | {CRP} => {COP} | 0.21667 | 0.30952 | 0.70000 | 0.99490 |
| 69 | {COP} => {CRP} | 0.21667 | 0.69643 | 0.31111 | 0.99490 |
| 70 | {EMP} => {FTP} | 0.18889 | 0.47222 | 0.40000 | 0.98837 |
| 71 | {FTP} => {EMP} | 0.18889 | 0.39535 | 0.47778 | 0.98837 |
| 72 | {COP,CPOTEV} => {TP} | 0.16667 | 0.90910 | 0.18333 | 0.98576 |
| 73 | {CRP,TP} => {COP} | 0.20000 | 0.30509 | 0.65556 | 0.98063 |
| 74 | {CRP,FTP} => {TP} | 0.30000 | 0.90000 | 0.33333 | 0.97590 |
| 75 | {AP,TP} => {FTP} | 0.15000 | 0.46552 | 0.32222 | 0.97434 |
| 76 | {FTP} => {TP} | 0.42778 | 0.89535 | 0.47778 | 0.97086 |
| 77 | {TP} => {FTP} | 0.42778 | 0.46386 | 0.92222 | 0.97086 |
| 78 | {EMP,TP} => {FTP} | 0.17778 | 0.46377 | 0.38333 | 0.97068 |
| 79 | {COP} => {TP} | 0.27778 | 0.89286 | 0.31111 | 0.96816 |
| 80 | {TP} => {COP} | 0.27778 | 0.30120 | 0.92222 | 0.96816 |
| 81 | {FTP,LSPOTSB} => {TP} | 0.26667 | 0.88889 | 0.30000 | 0.96386 |
| 82 | {LSPOTSB,TP} => {CRP} | 0.18333 | 0.67347 | 0.27222 | 0.96210 |
| 83 | {AP} => {FTP} | 0.15556 | 0.45901 | 0.33889 | 0.96073 |
| 84 | {FTP} => {AP} | 0.15556 | 0.32558 | 0.47778 | 0.96073 |
| 85 | {CPOTEV} => {TP} | 0.17222 | 0.88571 | 0.19444 | 0.96041 |
| 86 | {CRP,TP} => {FTP} | 0.30000 | 0.45762 | 0.65556 | 0.95782 |
| 87 | {LSPOTSB} => {TP} | 0.27222 | 0.87500 | 0.31111 | 0.94880 |
| 88 | {CRP,LSPOTSB} => {TP} | 0.18333 | 0.82500 | 0.22222 | 0.89458 |

COP: Connecting point; FTP: Five Transport Point; CPOTEV: Confluence Point of The Eight Vessels; TP: Transport Point; CRP: Crossing Point; EMP: Eight Meeting Point; AP: Alarm Point; LSPOTSB: Lower Sea Point of The Six Bowels.

Supplementary Table 3. The list of the 18 meridian association rules mined from retrieved CCTs

| **NO.** | **Association rules** | **Support** | **Confidence** | **Coverage** | **Lift** |
| --- | --- | --- | --- | --- | --- |
| 1 | {BL,ST} => {CV} | 0.19126 | 0.56452 | 0.33880 | 1.47580 |
| 2 | {CV} => {ST} | 0.20765 | 0.54286 | 0.38251 | 1.41918 |
| 3 | {ST} => {CV} | 0.20765 | 0.54285 | 0.38251 | 1.41918 |
| 4 | {BL,CV} => {ST} | 0.19126 | 0.53030 | 0.36066 | 1.38636 |
| 5 | {BL,GV} => {CV} | 0.16940 | 0.43056 | 0.39344 | 1.12560 |
| 6 | {CV} => {GV} | 0.18033 | 0.47143 | 0.38251 | 1.12041 |
| 7 | {GV} => {CV} | 0.18033 | 0.42857 | 0.42077 | 1.12041 |
| 8 | {BL,CV} => {GV} | 0.16940 | 0.46970 | 0.36066 | 1.11629 |
| 9 | {CV} => {BL} | 0.36066 | 0.94286 | 0.38251 | 1.02704 |
| 10 | {BL} => {CV} | 0.36066 | 0.39286 | 0.91803 | 1.02704 |
| 11 | {CV,GV} => {BL} | 0.16940 | 0.93939 | 0.18033 | 1.02327 |
| 12 | {GV} => {BL} | 0.39344 | 0.93507 | 0.42077 | 1.01855 |
| 13 | {BL} => {GV} | 0.39344 | 0.42857 | 0.91803 | 1.01855 |
| 14 | {CV,ST} => {BL} | 0.19126 | 0.92105 | 0.20765 | 1.00329 |
| 15 | {ST} => {BL} | 0.33880 | 0.88571 | 0.38251 | 0.96480 |
| 16 | {BL} => {ST} | 0.33880 | 0.36905 | 0.91803 | 0.96480 |
| 17 | {LU} => {BL} | 0.28415 | 0.85246 | 0.33333 | 0.92857 |
| 18 | {BL} => {LU} | 0.28415 | 0.30952 | 0.91803 | 0.92857 |
